# Supplementary material
Source: Elsevier journal article supplement (https://www.sciencedirect.com/science/article/pii/S2173572723000164)
Supplement: mmc1 [file S2173572723000164:mmc1.doc]

**Questionnaire: Degree of involvement of Spanish residents in Intensive Care Medicine in post-intensive care follow-up**

1. Sex: M/F
2. Age
3. Autonomous Community (region) where you work
4. Residency training year
5. If you are a staff physician, in what year did you complete your residency?
6. Have you done any other residency before intensive care? *YES/NO*
7. Have you heard about post-intensive care syndrome (PICS)? *YES/NO*
8. If you have heard about PICS, was it as a consequence of the COVID-19 pandemic? *YES/NO*
9. How would you rate your interest in PICS? *Little, regular or much*.
10. Is there a post-ICU follow-up clinic in your Unit? *YES/NO*
11. Does this follow-up include the relatives? *YES/NO*
12. If the clinic exists, do you participate in the post-ICU follow-up program? *YES/NO*
13. If you participate in post-ICU patient follow-up, do you think that the experience has changed your daily practice? *YES/NO*
14. How would you rate the importance of post-ICU follow-up training in the context of the residency? *Little, regular or much*.
15. Would you like more post-ICU follow-up training courses to be available? *YES/NO*
